# Supplementary material for: Rapid, field-deployable method for collecting and preserving plant metabolome for biochemical and functional characterization
Source: PLOS journal article supplement (doi:10.1371/journal.pone.0203569), 2018-09-06
Supplement: S2 (10.1371/journal.pone.0203569.s002) [file journal.pone.0203569.s002]

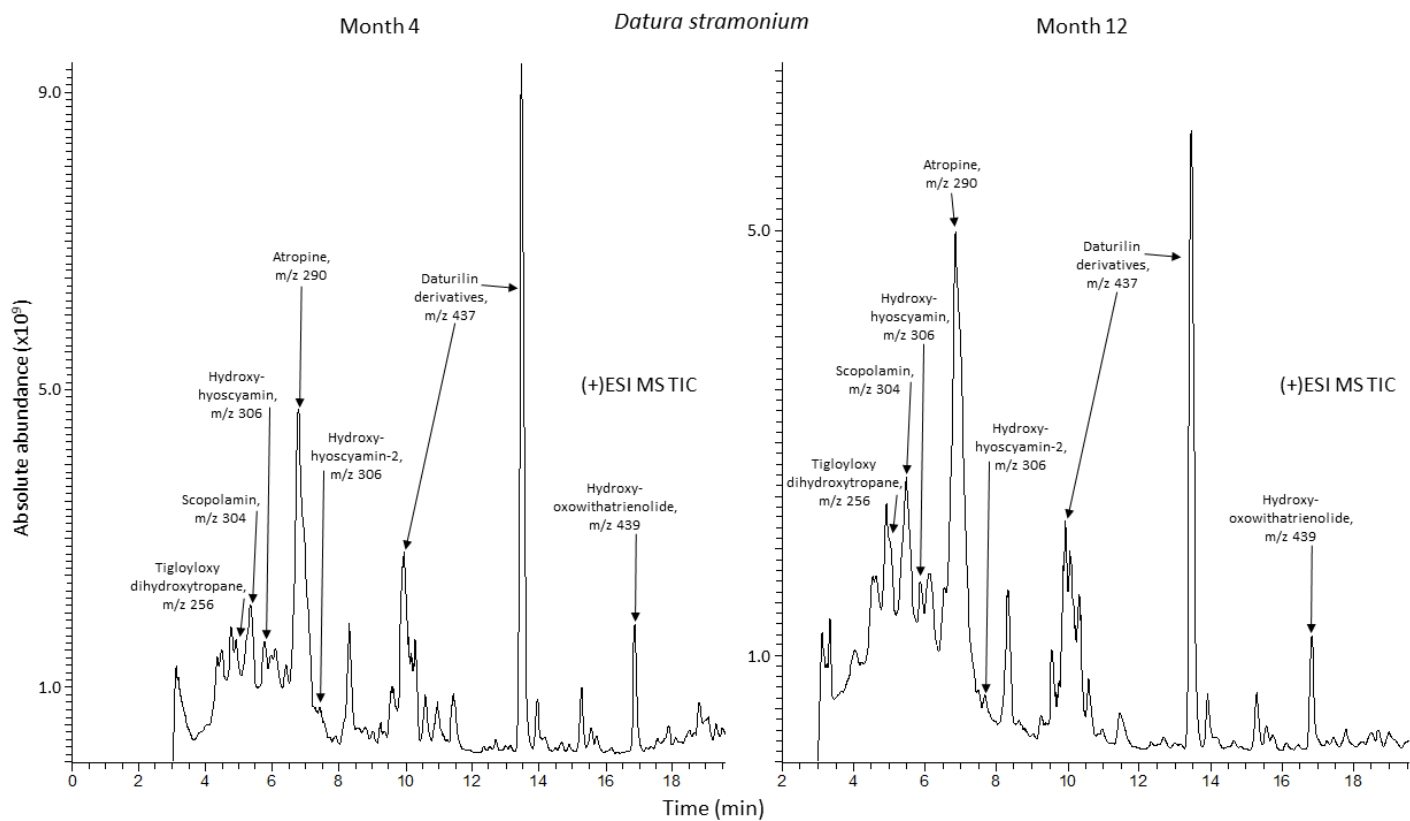

**S2 Fig.** Representative total ion current chromatograms (MS scanning mode from  $m/z$  100 to  $m/z$  1000) of eluates from *Datura stramonium* RAMES libraries after LCMS analyses following 4 and 12 month storage at  $-20^\circ\text{C}$ .

Peak identification based on isotope abundance analysis of high-resolution mass spectral data and reporting the best fitting empirical formula, as well as literature reports.
