# Supplementary material for: Rapid, field-deployable method for collecting and preserving plant metabolome for biochemical and functional characterization
Source: PLOS journal article supplement (doi:10.1371/journal.pone.0203569), 2018-09-06
Supplement: S4 (10.1371/journal.pone.0203569.s004) [file journal.pone.0203569.s004]

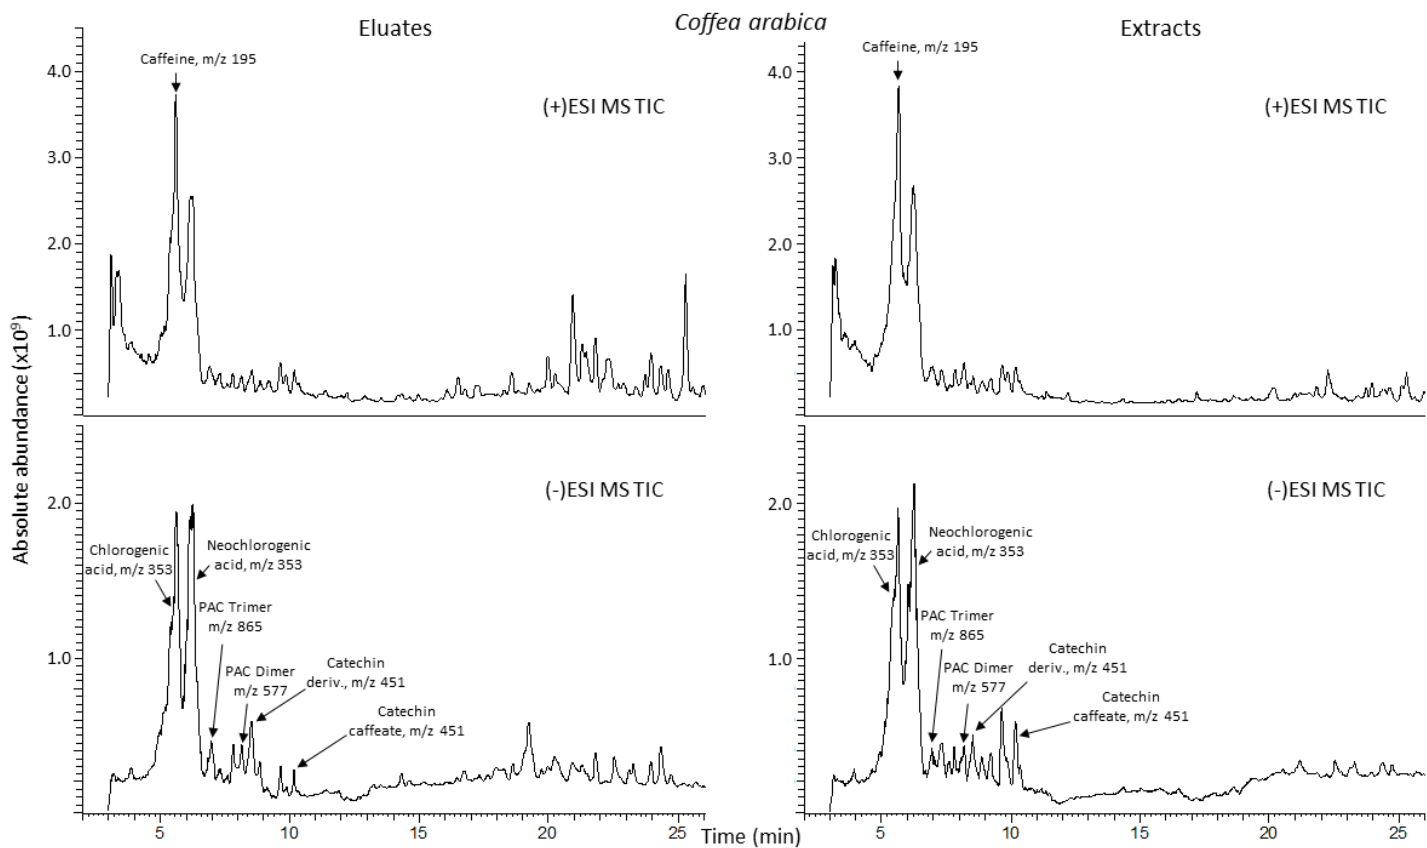

**S4 Fig.** Representative total ion current chromatograms (MS scanning mode from  $m/z$  100 to  $m/z$  1000) of eluates and extracts from *Coffea arabica*.

Peak identification based on isotope abundance analysis of high-resolution mass spectral data and reporting the best fitting empirical formula, as well as retention time of available commercial standards.
